# Supplementary material
Source: Springer Nature journal article supplement (https://www.springermedizin.de/resource/supplementary/12937_2006_111_MOESM2_ESM.pdf/25654418)

CD4+ cell percentage of lymphocytes

80  
60  
40  
20  
0

□ Oedema  
■ No Oedema

Positive

Negative

HIV status

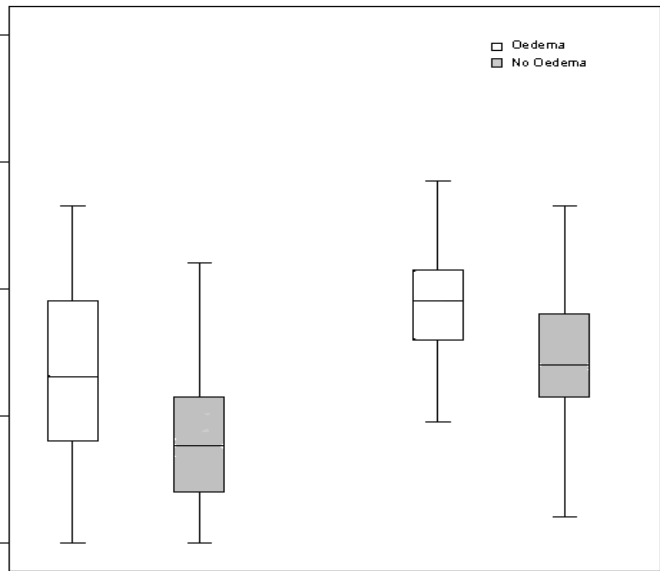

Supplement: MOESM2 [file 25654418]
